# Supplementary material for: Ultrafast carrier dynamics in BiVO4 thin film photoanode material: interplay between free carriers, trapped carriers and low-frequency lattice vibrations
Source: Royal Society of Chemistry journal article supplement (doi:10.1039/c6ta07177e), 2016-01-01
Supplement: c6ta07177e1.pdf [file c6ta07177e1.pdf]

Supplementary information

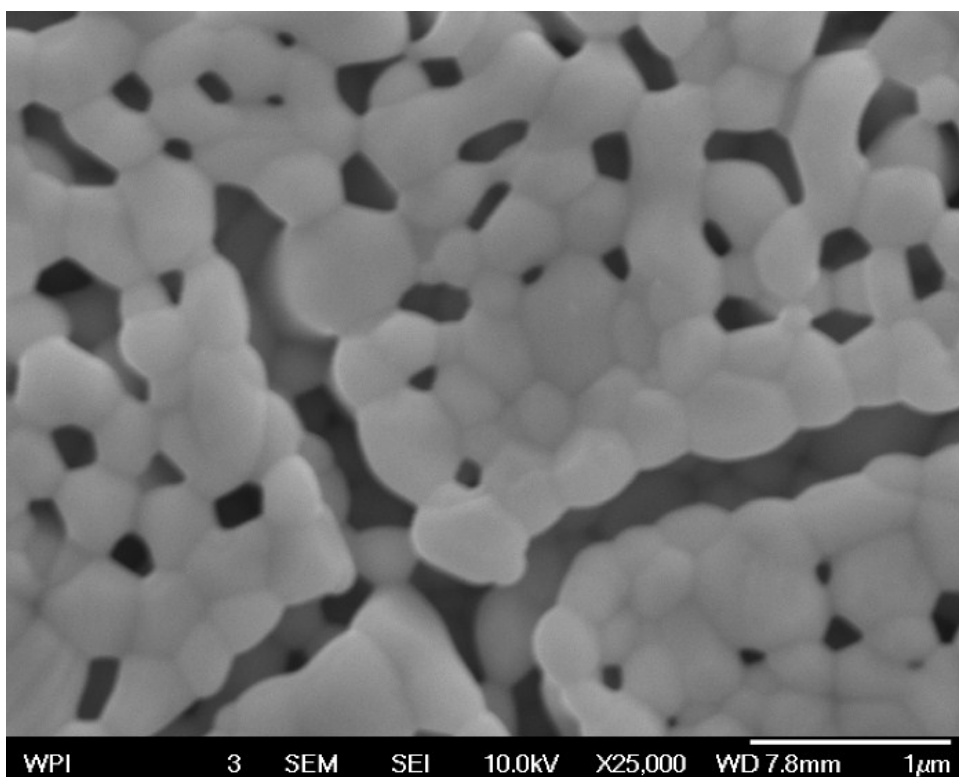

Supplementary Figure S1. SEM micrograph of BiVO<sub>4</sub> film on quartz substrate.

The optimised geometries and vibrational spectrum data presented here are available at [https://github.com/keeto/BiVO4\\_HoleVibrations](https://github.com/keeto/BiVO4_HoleVibrations)
